# Supplementary material for: A Nomogram That Includes Neutrophils and High-Density Lipoprotein Cholesterol Can Predict the Prognosis of Acute Ischaemic Stroke
Source: PubMed Central journal article supplement (PMC8914087; doi:10.3389/fneur.2022.827279), 2022-02-25
Supplement: Data_Sheet_1.pdf [file Data_Sheet_1.pdf]

## Supplementary material in **FIGURE 2**:

RStudio

File Edit Code View Plots Session Build Debug Profile Tools Help

Go to file/function Addins

untitled1\* x nom1 x nom1 x

Show Attributes

| Name           | Type                    | Value                   |
|----------------|-------------------------|-------------------------|
| nom1           | list [7] (S3: nomogram) | List of length 7        |
| groups         | list [3]                | List of length 3        |
| groups         | double [4]              | 0 1 2 3                 |
| Xbeta          | double [4]              | 0.000 0.284 0.568 0.852 |
| points         | double [4]              | 0.0 14.3 28.7 43.0      |
| age            | list [3]                | List of length 3        |
| age            | double [2]              | 0 1                     |
| Xbeta          | double [2]              | 0.000 0.797             |
| points         | double [2]              | 0.0 40.3                |
| stroke         | list [3]                | List of length 3        |
| stroke         | double [2]              | 0 1                     |
| Xbeta          | double [2]              | 0.000 0.624             |
| points         | double [2]              | 0.0 31.5                |
| NIHSSmorethan5 | list [3]                | List of length 3        |
| NIHSSmorethan5 | double [2]              | 0 1                     |
| Xbeta          | double [2]              | 0.00 1.98               |
| points         | double [2]              | 0 100                   |
| mRSmorethan1   | list [3]                | List of length 3        |
| mRSmorethan1   | double [2]              | 0 1                     |
| Xbeta          | double [2]              | 0.00 1.63               |
| points         | double [2]              | 0.0 82.2                |

nom1

Console

Scores for different groups based on R's nomogram.

groups= neutrophils and high-density lipoprotein states

age= Age  $\geq$  60 years old

stroke= with a history of stroke

NIHSSmorethan5= NIHSS > 5 at admission

mRSmorethan1= mRS > 1 before the onset
